# Supplementary material for: Isolation of Genes Involved in Biofilm Formation of a Klebsiella pneumoniae Strain Causing Pyogenic Liver Abscess
Source: PubMed Central journal article supplement (PMC3155550; doi:10.1371/journal.pone.0023500), 2011-08-12
Supplement: pone.0023500.s001.pdf [file pone.0023500.s001.pdf]

Table S1. Primers used in this study.

| Primers       | Sequence (5' → 3')    | Purpose                               | Source     |
|---------------|-----------------------|---------------------------------------|------------|
| Km2921R       | GTACCGAGCTCGAATTCGGC  | Transposon mutant sequencing          | [30]       |
| Km4180F       | GTTTCATTTGATGCTCGATG  | Transposon mutant sequencing          | [30]       |
| KP0416(+3)F   | TACAGGCACAACGAGCAC    | <i>sugE</i> deletion mutant construct | This study |
| KP0422(+16)F  | CTATCTGGGTACCTGGTATG  | <i>sugE</i> deletion mutant construct | This study |
| KP0420(-1)R   | AAGGCTCCTTTGCTGGG     | <i>sugE</i> deletion mutant construct | This study |
| KP0421(+534)R | CTAATCATAGCGCTGATTGAC | <i>sugE</i> deletion mutant construct | This study |
| KP0420(-138)F | GTCAACGGTACGGTTTAGCG  | <i>sugE</i> complementation construct | This study |
| KP0421(+528)F | TGATTAGTGC GCGCTGATC  | <i>sugE</i> complementation construct | This study |
| KP1237R2      | AATAGCTACTCCGACGG     | Complementation confirmation          | [28]       |
| KP1235F2      | GCGCACGTATCGATCTC     | Complementation confirmation          | [28]       |
| Kp0530-1000-F | GTGATCCCGGTGAGATG     | <i>treC</i> deletion mutant construct | This study |
| Kp0530+1000-R | CTTCCTGTGGCTGATTGG    | <i>treC</i> deletion mutant construct | This study |
| Kp0530-I-F    | AGTACTTTCCTGCTGCAA    | <i>treC</i> deletion mutant construct | This study |
| Kp0530-I-R    | CGCTTTTCCCCGGTGGC     | <i>treC</i> deletion mutant construct | This study |
| Kp0530-1293-F | GATTGGCTCATTCTTCTCG   | <i>treC</i> deletion mutant construct | This study |
| Kp0530+1158-R | CAGTTAATCTCGCACTTCG   | <i>treC</i> deletion mutant construct | This study |
| Kp0530p-F     | CGATCTGCTCGATCAACT    | <i>treC</i> complementation construct | This study |
| KP0530-R      | TTATCCCTGCAGCCACCA    | <i>treC</i> complementation construct | This study |
| Kp0530p-IF    | CCTCAAAAACAGAGGGGA    | <i>treC</i> complementation construct | This study |
| Kp0530R-IR    | ACTTTCCTGCTGCAACGA    | <i>treC</i> complementation construct | This study |

|             |                                  |                                       |            |
|-------------|----------------------------------|---------------------------------------|------------|
| treR-RR     | AGCGGCGTAGGGAAATCG               | <i>treB</i> deletion mutant construct | This study |
| treB-F      | CCCGTTTGCGCTTTGTG                | <i>treB</i> deletion mutant construct | This study |
| wza-1113F   | CGACAGTGAATGCGTCATT              | <i>wza</i> deletion mutant construct  | This study |
| wza+1002R   | TGACTGGCTTCCTGATGC               | <i>wza</i> deletion mutant construct  | This study |
| wza-IR      | CCATATGTTTAAATCAGTTTAA           | <i>wza</i> deletion mutant construct  | This study |
| wza-IF 5'   | AATGTCACATCATTAGTAAAC            | <i>wza</i> deletion mutant construct  | This study |
| rmpA-F      | CACCAAGTATGGTTGCTCCG             | <i>rmpA</i> deletion mutant construct | This study |
| rmpA-R      | CTACGCATTCATTCTCCTTC             | <i>rmpA</i> deletion mutant construct | This study |
| P rmpA-R    | ATCCTTAATGAGCCAAATGT             | <i>rmpA</i> deletion mutant construct | This study |
| P rmpA-F(i) | GTAAAAAAGGGGAGGGGATG             | <i>rmpA</i> deletion mutant construct | This study |
| P rmpA-F(g) | TGGGATCAGTTCACAAGGTG             | <i>rmpA</i> deletion mutant construct | This study |
| PrmpA-R(g)  | CAAATCTTTGGAAACAAAAAG<br>C       | <i>rmpA</i> deletion mutant construct | This study |
| gal-145F    | GCCGGGATCAAAGAGATTGTT            | Expression level of <i>galF</i>       | This study |
| gal-217R    | AGGAGGTGTCGAAGTGGTTTT<br>C       | Expression level of <i>galF</i>       | This study |
| KP3720-RF   | GTCAGGTACGCCAGGATATCG            | Expression level of <i>wza</i>        | This study |
| KP3720-RR   | CATCAACCTGAGGGCTTTCAA            | Expression level of <i>wza</i>        | This study |
| 2707F       | GAGGCCGAAGTATCCAAACT             | Expression level of <i>wzc</i>        | This study |
| 2872R       | CAACCTGGACATCACGAGTT             | Expression level of <i>wzc</i>        | This study |
| KP3714-RF   | GCAATATGGCCAGTCCGAAA             | Expression level of <i>magA</i>       | This study |
| KP3714-RR   | AAAACGTGGCTATTGCATGAT<br>G       | Expression level of <i>magA</i>       | This study |
| wcaG-RF     | TTCCACTACCCCAAACAACGA            | Expression level of <i>wcaG</i>       | This study |
| wcaG-RR     | TGCGGCGCTTTCATGA                 | Expression level of <i>wcaG</i>       | This study |
| manB-RF     | CGCTGCGGGTCACGAT                 | Expression level of <i>manB</i>       | This study |
| manB-RR     | GCCGGGAGCGAAAATCA                | Expression level of <i>manB</i>       | This study |
| KP3619-202F | GGAAAATGGAGAGGGTACAA<br>AATG     | Expression level of <i>rmpA</i>       | This study |
| KP3619-322R | CATAGATGTCATAATCACACC<br>CTTTAGG | Expression level of <i>rmpA</i>       | This study |
| treB-R      | ATGCGCAGCTGCTCAATCT              | Expression level of <i>treB</i>       | This study |
| treB-F      | CCCGTTTGCGCTTTGTG                | Expression level of <i>treB</i>       | This study |
| treC-RF     | CCGACAGCGGGCAGTATT               | Expression level of <i>treC</i>       | This study |
| treC-RR     | CGCCGGATTCTCCAGTT                | Expression level of <i>treC</i>       | This study |
| licC-RF     | CTGGCGCGATAAAATGTTGTA<br>C       | Expression level of <i>licC</i>       | This study |

|         |                       |                                 |            |
|---------|-----------------------|---------------------------------|------------|
| licC-RR | TGCCGAAGCTGGAAATCAG   | Expression level of <i>licC</i> | This study |
| rpoB-RF | CGTGCTGTTGCCGTTGAC    | Expression level of <i>rpoB</i> | This study |
| rpoB-RR | GGGAAGCATCCACGTAAGTAA | Expression level of <i>rpoB</i> | This study |
| gyrA-RF | GCGGCGATAATGTCCTTCAG  | Expression level of <i>gyrA</i> | This study |
| gyrA-RR | GTCTCCTTCGGCATCAACATG | Expression level of <i>gyrA</i> | This study |

---
