# Supplementary material for: Isolation of Genes Involved in Biofilm Formation of a Klebsiella pneumoniae Strain Causing Pyogenic Liver Abscess
Source: PubMed Central journal article supplement (PMC3155550; doi:10.1371/journal.pone.0023500), 2011-08-12
Supplement: pone.0023500.s002.pdf [file pone.0023500.s002.pdf]

Table S2. Results of *Klebsiella pneumoniae* NTUH-K2044 transposon mutants.

| Mutant                                                                       | Probable interrupted gene (NTUH-K2044 ORF) | Function/probable function                                                                                                                                                                                                 | Gene size (bp) | Tn insertion point |
|------------------------------------------------------------------------------|--------------------------------------------|----------------------------------------------------------------------------------------------------------------------------------------------------------------------------------------------------------------------------|----------------|--------------------|
| <b>Mutants with decreased biofilm formation</b>                              |                                            |                                                                                                                                                                                                                            |                |                    |
| Cellular processes and signaling                                             |                                            |                                                                                                                                                                                                                            |                |                    |
| Tn4-87                                                                       | KP1_0404                                   | Putative secretion ATPase. Belongs to HlyD protein family involved in multidrug resistance.                                                                                                                                | 1220           | 566                |
| Tn4-97                                                                       | KP1_3573                                   | Polymyxin B resistance protein, <i>pmrD</i> . Prolongs the half-life of phosphorylated- <i>pmrA</i> , which is a two-component system regulator involved in modification of lipopolysaccharide and polymyxin B resistance. | 245            | 32                 |
| Tn9-39                                                                       | KP1_3178                                   | Formate dehydrogenase H selenopolypeptide subunit, <i>fdhF</i> . Metabolism of formate under anaerobic conditions.                                                                                                         | 2150           | 572                |
| Tn10-33                                                                      | KP1_1271                                   | Caseinolytic peptidase X homolog, <i>clpx</i> . A ATPase belonged to the AAA+ (ATPases associated with various cellular activities) family ATPases. Involves in the protein degradation.                                   | 1274           | 763                |
| Tn11-19                                                                      | KP1_4552                                   | Putative LuxR family bacterial regulatory protein. Transcriptional regulator that involves in the regulation of quorum sensing.                                                                                            | 584            | 469                |
| Tn12-06                                                                      | KP1_0578                                   | Putative exonuclease.                                                                                                                                                                                                      | 989            | 639                |
| Tn20-28                                                                      | KP1_3171                                   | CRISPR-associated helicase Cas3 domain-containing (HD-nuclease and DEXD helicase domain) protein. Unwinds DNA/DNA and DNA/RNA duplexes. Interferences with virus proliferation.                                            | 2615           | 2035               |
| Surface molecules (capsule, adhesion polysaccharide, and pilin) biosynthesis |                                            |                                                                                                                                                                                                                            |                |                    |
| Tn3-2                                                                        | KP1_3720                                   | Putative capsular polysaccharide export protein precursor, <i>wza</i> . Capsular polysaccharide transport.                                                                                                                 | 1133           | 973                |
| Tn16-47                                                                      | KP1_0383                                   | Outer membrane protein, <i>pgaA</i> . Exopolysaccharide biosynthesis                                                                                                                                                       | 2489           | 511                |
| Tn19-26                                                                      | KP1_3718                                   | Inner membrane tyrosin kinase, <i>wzc</i> . Capsular biosynthesis                                                                                                                                                          | 2153           | 1347               |
| Tn24-36                                                                      | KP1_4245                                   | Probable pilin chaperone, <i>fim</i> . Pilin biosynthesis.                                                                                                                                                                 | 668            | 165                |
| Carbohydrate transport and metabolism                                        |                                            |                                                                                                                                                                                                                            |                |                    |
| Tn10-43                                                                      | KP1_3030                                   | 6-phospho-beta-glucosidase A. Catalyzes the hydrolysis of 6-phospho-beta-D-glucosyl-(1,4)-D-glucose to produce D-glucose and D-glucose and 6-phosphate. Participates in glycolysis/gluconeogenesis.                        | 1421           | 475                |

|                                                 |          |                                                                                                                                                                                                            |      |       |
|-------------------------------------------------|----------|------------------------------------------------------------------------------------------------------------------------------------------------------------------------------------------------------------|------|-------|
| Tn12-16                                         | KP1_2884 | PTS system, cellobiose-specific IIC component, <i>celB</i> . One of subunit of the membrane permease, which is responsible for the recognition and transport of the sugar across the cytoplasmic membrane. | 1280 | 615   |
| Tn16-6,<br>Tn18-57,<br>Tn19-70                  | KP1_0530 | Trehalose-6-phosphate hydrolase, <i>treC</i> . Catalyzes the hydrolysis of trehalose-6-phosphate to produce glucose and glucose-6-phosphate.                                                               | 1655 | 1505  |
| Tn23-31                                         | KP1_5472 | Probable D-galactonate transport protein, <i>dgoT</i> . Belongs to Major Facilitator Superfamily.                                                                                                          | 1337 | 180   |
| Unknown function                                |          |                                                                                                                                                                                                            |      |       |
| Tn4-96                                          | KP1_1830 | Hypothetical protein. Unknown                                                                                                                                                                              | 122  | -1352 |
| Tn8-61                                          | KP1_2181 | Hypothetical protein. Unknown                                                                                                                                                                              | 539  | 377   |
| Tn9-30                                          | KP1_3087 | Hypothetical protein. Unknown                                                                                                                                                                              | 326  | 3     |
| Tn14-86                                         | KP1_3087 | Hypothetical protein. Unknown                                                                                                                                                                              | 326  | 116   |
| Tn10-49                                         | KP_p012  | Hypothetical protein. Unknown                                                                                                                                                                              | 995  | 180   |
| Tn21-15                                         | KP1_0662 | Hypothetical protein. Unknown                                                                                                                                                                              | 2222 | 213   |
| <b>Mutants with increased biofilm formation</b> |          |                                                                                                                                                                                                            |      |       |
| Inorganic ion transport and metabolism          |          |                                                                                                                                                                                                            |      |       |
| Tn10-23                                         | KP1_0420 | Small multidrug resistance protein, <i>sugE</i> . Confers resistance to quaternary cation compounds.                                                                                                       | 317  | -7    |
| Transcription                                   |          |                                                                                                                                                                                                            |      |       |
| Tn24-71                                         | KP1_3465 | Cold-shock protein, <i>cspC</i> . Regulates <i>rpoS</i> -dependent stress response, through stabilization of <i>rpoS</i> transcript.                                                                       | 209  | -706  |
| Unknown function                                |          |                                                                                                                                                                                                            |      |       |
| Tn10-19                                         | KP1_2828 | Conserved hypothetical protein. Unknown.                                                                                                                                                                   | 899  | 695   |
| Tn10-30                                         | KP1_2389 | Conserved hypothetical protein. Unknown.                                                                                                                                                                   | 1532 | 1358  |
